# Supplementary material for: A Network-Based Approach to Explore the Mechanisms of Uncaria Alkaloids in Treating Hypertension and Alleviating Alzheimer’s Disease
Source: MDPI journal article supplement (doi:10.3390/ijms21051766), 2020-03-04
Supplement: s1 [file s1]

## Supplementary Material:

### A network-based approach to explore the mechanisms of Uncaria alkaloids in treating hypertension and alleviating Alzheimer's disease

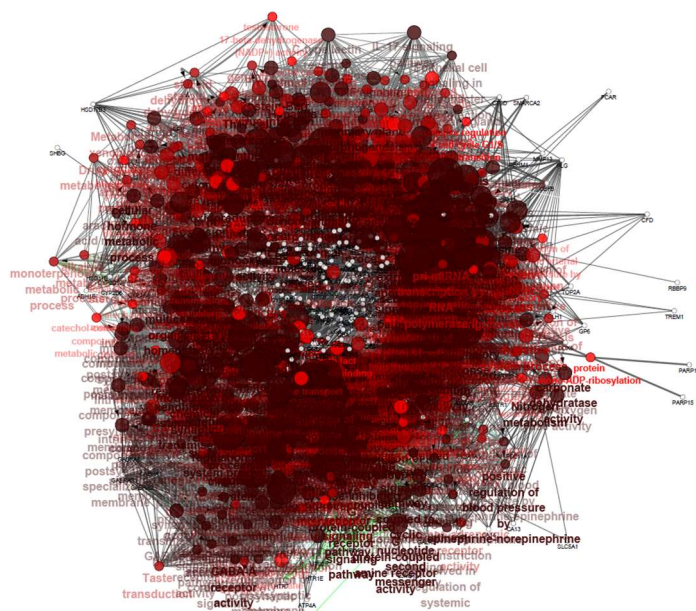

**Figure S1.** Network of compound-target gene interactions for Uncaria alkaloids built by linking the identified 85 compounds and 254 target genes using ADME screening.

**Table S1** List of the 143 Uncaria alkaloids isolated from Uncaria genus

| No.                                                | Compound name                      | Molecular formula                                              | Molecular weight | References |
|----------------------------------------------------|------------------------------------|----------------------------------------------------------------|------------------|------------|
| <b><i>β</i>-carboline type</b>                     |                                    |                                                                |                  |            |
| 1                                                  | harmane                            | C <sub>12</sub> H <sub>10</sub> N <sub>2</sub>                 | 182.0844         | [1]        |
| 2                                                  | lyaloside                          | C <sub>27</sub> H <sub>30</sub> O <sub>9</sub> N <sub>2</sub>  | 526.1951         | [2]        |
| 3                                                  | deoxycordifoline                   | C <sub>28</sub> H <sub>30</sub> O <sub>11</sub> N <sub>2</sub> | 570.1850         | [3]        |
| 4                                                  | 5 <i>β</i> -carboxystrictosidine   | C <sub>28</sub> H <sub>34</sub> O <sub>11</sub> N <sub>2</sub> | 574.2163         | [2]        |
| 5                                                  | 3,4-dehydro-5-carboxystrictosidine | C <sub>28</sub> H <sub>32</sub> O <sub>11</sub> N <sub>2</sub> | 572.2006         | [2]        |
| 6                                                  | hirsutaside A                      | C <sub>30</sub> H <sub>38</sub> O <sub>11</sub> N <sub>2</sub> | 602.2476         | [4]        |
| 7                                                  | hirsutaside D                      | C <sub>43</sub> H <sub>52</sub> O <sub>18</sub> N <sub>2</sub> | 884.3215         | [5]        |
| 8                                                  | neonaucleoside B                   | C <sub>45</sub> H <sub>54</sub> O <sub>20</sub> N <sub>2</sub> | 942.3270         | [5]        |
| 9                                                  | bahienoside A                      | C <sub>44</sub> H <sub>58</sub> O <sub>18</sub> N <sub>2</sub> | 902.3685         | [5]        |
| 10                                                 | bahienoside B                      | C <sub>44</sub> H <sub>58</sub> O <sub>18</sub> N <sub>2</sub> | 902.3685         | [5]        |
| <b>tetracyclic monoterpene oxindole type, tMOA</b> |                                    |                                                                |                  |            |
| 11                                                 | corynoxine                         | C <sub>22</sub> H <sub>26</sub> O <sub>4</sub> N <sub>2</sub>  | 382.1893         | [6]        |
| 12                                                 | isocorynoxine                      | C <sub>22</sub> H <sub>26</sub> O <sub>4</sub> N <sub>2</sub>  | 382.1893         | [6]        |
| 13                                                 | corynoxine                         | C <sub>22</sub> H <sub>28</sub> O <sub>4</sub> N <sub>2</sub>  | 384.2049         | [7]        |
| 14                                                 | corynoxine B                       | C <sub>22</sub> H <sub>28</sub> O <sub>4</sub> N <sub>2</sub>  | 384.2049         | [8]        |
| 15                                                 | 18,19-dehydrocorynxinic acid       | C <sub>21</sub> H <sub>24</sub> O <sub>4</sub> N <sub>2</sub>  | 368.1736         | [9]        |
| 16                                                 | 18,19-dehydrocorynxinic acid B     | C <sub>21</sub> H <sub>24</sub> O <sub>4</sub> N <sub>2</sub>  | 368.1736         | [9]        |
| 17                                                 | rhynchophyllic acid                | C <sub>21</sub> H <sub>26</sub> O <sub>4</sub> N <sub>2</sub>  | 370.1893         | [10]       |
| 18                                                 | isorhynchophyllic acid             | C <sub>21</sub> H <sub>26</sub> O <sub>4</sub> N <sub>2</sub>  | 370.1893         | [10]       |

|                                                    |                                                    |                                                               |          |      |
|----------------------------------------------------|----------------------------------------------------|---------------------------------------------------------------|----------|------|
| 19                                                 | rhynchophylline                                    | C <sub>22</sub> H <sub>28</sub> O <sub>4</sub> N <sub>2</sub> | 384.2049 | [6]  |
| 20                                                 | isorhynchophylline                                 | C <sub>22</sub> H <sub>28</sub> O <sub>4</sub> N <sub>2</sub> | 384.2049 | [6]  |
| 21                                                 | 22-O-demethyl-22-O-β-D-glucopyranosylisocorynoxine | C <sub>27</sub> H <sub>34</sub> O <sub>9</sub> N <sub>2</sub> | 530.2264 | [11] |
| 22                                                 | corynoxine N-oxide                                 | C <sub>22</sub> H <sub>26</sub> O <sub>5</sub> N <sub>2</sub> | 398.1842 | [11] |
| 23                                                 | isocorynoxine N-oxide                              | C <sub>22</sub> H <sub>26</sub> O <sub>5</sub> N <sub>2</sub> | 398.1842 | [11] |
| 24                                                 | rhynchophylline N-oxide                            | C <sub>22</sub> H <sub>28</sub> O <sub>5</sub> N <sub>2</sub> | 400.1998 | [11] |
| 25                                                 | isorhynchophylline N-oxide                         | C <sub>22</sub> H <sub>28</sub> O <sub>5</sub> N <sub>2</sub> | 400.1998 | [11] |
| 26                                                 | dihydrocorynantheine pseudoindoxyl                 | C <sub>22</sub> H <sub>28</sub> O <sub>4</sub> N <sub>2</sub> | 384.2049 | [1]  |
| 27                                                 | macrophyllionium                                   | C <sub>23</sub> H <sub>30</sub> O <sub>4</sub> N <sub>2</sub> | 398.2206 | [7]  |
| 28                                                 | macrophylline A                                    | C <sub>25</sub> H <sub>32</sub> O <sub>5</sub> N <sub>2</sub> | 440.2311 | [7]  |
| 29                                                 | macrophylline B                                    | C <sub>25</sub> H <sub>32</sub> O <sub>5</sub> N <sub>2</sub> | 440.2311 | [7]  |
| 30                                                 | villocarine C                                      | C <sub>22</sub> H <sub>26</sub> O <sub>5</sub> N <sub>2</sub> | 398.1842 | [12] |
| 31                                                 | villocarine D                                      | C <sub>22</sub> H <sub>26</sub> O <sub>4</sub> N <sub>2</sub> | 382.1893 | [12] |
| <b>tetracyclic monoterpene indole type, tMIA</b>   |                                                    |                                                               |          |      |
| 32                                                 | corynantheidine                                    | C <sub>22</sub> H <sub>28</sub> O <sub>3</sub> N <sub>2</sub> | 368.2100 | [7]  |
| 33                                                 | dihydrovallesiachotamine                           | C <sub>21</sub> H <sub>24</sub> O <sub>3</sub> N <sub>2</sub> | 352.1787 | [13] |
| 34                                                 | isovallesiachotamine                               | C <sub>21</sub> H <sub>22</sub> O <sub>3</sub> N <sub>2</sub> | 350.1630 | [13] |
| 35                                                 | hirsuteine                                         | C <sub>22</sub> H <sub>26</sub> O <sub>3</sub> N <sub>2</sub> | 366.1943 | [14] |
| 36                                                 | hirsutine                                          | C <sub>22</sub> H <sub>28</sub> O <sub>3</sub> N <sub>2</sub> | 368.2100 | [14] |
| 37                                                 | epi-allo-corynantheine                             | C <sub>22</sub> H <sub>26</sub> O <sub>3</sub> N <sub>2</sub> | 366.1943 | [1]  |
| 38                                                 | corynantheine                                      | C <sub>22</sub> H <sub>26</sub> O <sub>3</sub> N <sub>2</sub> | 366.1943 | [15] |
| 39                                                 | dihydrocorynantheine                               | C <sub>22</sub> H <sub>28</sub> O <sub>3</sub> N <sub>2</sub> | 368.2100 | [11] |
| 40                                                 | geissoschizine methyl ether                        | C <sub>22</sub> H <sub>26</sub> O <sub>3</sub> N <sub>2</sub> | 366.1943 | [16] |
| 41                                                 | 4-geissoschizine N-oxide methyl ether              | C <sub>22</sub> H <sub>26</sub> O <sub>4</sub> N <sub>2</sub> | 382.1893 | [17] |
| 42                                                 | 3-epi-geissoschizine methyl ether                  | C <sub>22</sub> H <sub>26</sub> O <sub>3</sub> N <sub>2</sub> | 366.1943 | [17] |
| 43                                                 | gambireine                                         | C <sub>22</sub> H <sub>26</sub> O <sub>4</sub> N <sub>2</sub> | 382.1893 | [18] |
| 44                                                 | gambirine                                          | C <sub>22</sub> H <sub>28</sub> O <sub>4</sub> N <sub>2</sub> | 384.2049 | [19] |
| 45                                                 | isogambirine                                       | C <sub>22</sub> H <sub>28</sub> O <sub>4</sub> N <sub>2</sub> | 384.2049 | [18] |
| 46                                                 | glabratine                                         | C <sub>27</sub> H <sub>34</sub> O <sub>9</sub> N <sub>2</sub> | 530.2264 | [3]  |
| 47                                                 | vallesiachotamine                                  | C <sub>21</sub> H <sub>22</sub> O <sub>3</sub> N <sub>2</sub> | 350.1630 | [13] |
| 48                                                 | villocarine A                                      | C <sub>22</sub> H <sub>26</sub> O <sub>3</sub> N <sub>2</sub> | 366.1943 | [12] |
| 49                                                 | hirsutine N-oxide                                  | C <sub>22</sub> H <sub>28</sub> O <sub>4</sub> N <sub>2</sub> | 384.2049 | [20] |
| 50                                                 | hirsuteine N-oxide                                 | C <sub>22</sub> H <sub>26</sub> O <sub>4</sub> N <sub>2</sub> | 382.1893 | [17] |
| 51                                                 | 16,17-dehydro-O-demethylhirsuteine                 | C <sub>21</sub> H <sub>26</sub> O <sub>3</sub> N <sub>2</sub> | 354.1943 | [21] |
| <b>pentacyclic monoterpene oxindole type, pMOA</b> |                                                    |                                                               |          |      |
| 52                                                 | mitraphylline                                      | C <sub>21</sub> H <sub>24</sub> O <sub>4</sub> N <sub>2</sub> | 368.1736 | [22] |
| 53                                                 | isomitraphylline                                   | C <sub>21</sub> H <sub>24</sub> O <sub>4</sub> N <sub>2</sub> | 368.1736 | [23] |
| 54                                                 | mitraphyllic acid                                  | C <sub>20</sub> H <sub>22</sub> O <sub>4</sub> N <sub>2</sub> | 354.1580 | [10] |
| 55                                                 | isomitraphyllic acid                               | C <sub>20</sub> H <sub>22</sub> O <sub>4</sub> N <sub>2</sub> | 354.1580 | [24] |
| 56                                                 | O-ethyl isomitraphylline                           | C <sub>22</sub> H <sub>26</sub> O <sub>4</sub> N <sub>2</sub> | 382.1893 | [23] |
| 57                                                 | mitraphyllic acid-(16-1)-β-D-glucopyranoside       | C <sub>26</sub> H <sub>32</sub> O <sub>9</sub> N <sub>2</sub> | 516.2108 | [24] |
| 58                                                 | isomitraphyllic acid-(16-1)-β-D-glucopyranoside    | C <sub>26</sub> H <sub>32</sub> O <sub>9</sub> N <sub>2</sub> | 516.2108 | [24] |
| 59                                                 | pteropodic acid                                    | C <sub>20</sub> H <sub>22</sub> O <sub>4</sub> N <sub>2</sub> | 354.1580 | [10] |
| 60                                                 | isopteropodic acid                                 | C <sub>20</sub> H <sub>22</sub> O <sub>4</sub> N <sub>2</sub> | 354.1580 | [10] |
| 61                                                 | pteropodine                                        | C <sub>21</sub> H <sub>24</sub> O <sub>4</sub> N <sub>2</sub> | 368.1736 | [25] |
| 62                                                 | isopteropodine                                     | C <sub>21</sub> H <sub>24</sub> O <sub>4</sub> N <sub>2</sub> | 368.1736 | [23] |
| 63                                                 | rauniticine oxindole A                             | C <sub>21</sub> H <sub>24</sub> O <sub>4</sub> N <sub>2</sub> | 368.1736 | [26] |
| 64                                                 | rauniticine oxindole B                             | C <sub>21</sub> H <sub>24</sub> O <sub>4</sub> N <sub>2</sub> | 368.1736 | [3]  |
| 65                                                 | speciophylline                                     | C <sub>21</sub> H <sub>24</sub> O <sub>4</sub> N <sub>2</sub> | 368.1736 | [23] |

|                                                             |                                                                     |                                                                |          |      |
|-------------------------------------------------------------|---------------------------------------------------------------------|----------------------------------------------------------------|----------|------|
| 66                                                          | uncarine A                                                          | C <sub>21</sub> H <sub>24</sub> O <sub>4</sub> N <sub>2</sub>  | 368.1736 | [27] |
| 67                                                          | uncarine F                                                          | C <sub>21</sub> H <sub>24</sub> O <sub>4</sub> N <sub>2</sub>  | 368.1736 | [23] |
| 68                                                          | uncaric acid A                                                      | C <sub>20</sub> H <sub>22</sub> O <sub>4</sub> N <sub>2</sub>  | 354.1580 | [4]  |
| 69                                                          | uncarine B                                                          | C <sub>21</sub> H <sub>24</sub> O <sub>4</sub> N <sub>2</sub>  | 368.1736 | [3]  |
| 70                                                          | rumberine                                                           | C <sub>21</sub> H <sub>24</sub> O <sub>5</sub> N <sub>2</sub>  | 384.1685 | [28] |
| 71                                                          | rotundifoline                                                       | C <sub>22</sub> H <sub>28</sub> O <sub>5</sub> N <sub>2</sub>  | 400.1998 | [1]  |
| 72                                                          | isorotundifoline                                                    | C <sub>22</sub> H <sub>28</sub> O <sub>5</sub> N <sub>2</sub>  | 400.1998 | [29] |
| 73                                                          | gambirdine                                                          | C <sub>21</sub> H <sub>24</sub> O <sub>4</sub> N <sub>2</sub>  | 368.1736 | [30] |
| 74                                                          | isogambirdine                                                       | C <sub>21</sub> H <sub>24</sub> O <sub>4</sub> N <sub>2</sub>  | 368.1736 | [30] |
| 75                                                          | rauniticin- <i>allo</i> acid B                                      | C <sub>20</sub> H <sub>22</sub> O <sub>4</sub> N <sub>2</sub>  | 354.1580 | [31] |
| 76                                                          | rauniticine- <i>allo</i> oxindole B                                 | C <sub>21</sub> H <sub>24</sub> O <sub>4</sub> N <sub>2</sub>  | 368.1736 | [31] |
| 77                                                          | mitraphylline <i>N</i> -oxide                                       | C <sub>21</sub> H <sub>24</sub> O <sub>5</sub> N <sub>2</sub>  | 384.1685 | [1]  |
| 78                                                          | isomitraphylline <i>N</i> -oxide                                    | C <sub>21</sub> H <sub>24</sub> O <sub>5</sub> N <sub>2</sub>  | 384.1685 | [1]  |
| 79                                                          | pteropodine <i>N</i> -oxide                                         | C <sub>21</sub> H <sub>24</sub> O <sub>5</sub> N <sub>2</sub>  | 384.1685 | [1]  |
| 80                                                          | isopterpodine <i>N</i> -oxide                                       | C <sub>21</sub> H <sub>24</sub> O <sub>5</sub> N <sub>2</sub>  | 384.1685 | [1]  |
| 81                                                          | speciophylline <i>N</i> -oxide                                      | C <sub>21</sub> H <sub>24</sub> O <sub>5</sub> N <sub>2</sub>  | 384.1685 | [1]  |
| 82                                                          | uncarine F <i>N</i> -oxide                                          | C <sub>21</sub> H <sub>24</sub> O <sub>5</sub> N <sub>2</sub>  | 384.1685 | [1]  |
| 83                                                          | uncarine B <i>N</i> -oxide                                          | C <sub>21</sub> H <sub>24</sub> O <sub>5</sub> N <sub>2</sub>  | 384.1685 | [32] |
| 84                                                          | akuammigine pseudoindoxyl                                           | C <sub>21</sub> H <sub>24</sub> O <sub>4</sub> N <sub>2</sub>  | 368.1736 | [26] |
| 85                                                          | rauniticine pseudoindoxyl                                           | C <sub>21</sub> H <sub>24</sub> O <sub>4</sub> N <sub>2</sub>  | 368.1736 | [26] |
| 86                                                          | 3-isorauniticine<br>pseudoindoxyl                                   | C <sub>21</sub> H <sub>24</sub> O <sub>4</sub> N <sub>2</sub>  | 368.1736 | [26] |
| <b>pentacyclic monoterpene indole type, pMIA</b>            |                                                                     |                                                                |          |      |
| 87                                                          | ajmalicine                                                          | C <sub>21</sub> H <sub>24</sub> O <sub>3</sub> N <sub>2</sub>  | 352.1787 | [26] |
| 88                                                          | 19- <i>epi</i> -ajmalicine                                          | C <sub>21</sub> H <sub>24</sub> O <sub>3</sub> N <sub>2</sub>  | 352.1787 | [26] |
| 89                                                          | 19- <i>epi</i> -3- <i>iso</i> -ajmalicine                           | C <sub>21</sub> H <sub>24</sub> O <sub>3</sub> N <sub>2</sub>  | 352.1787 | [1]  |
| 90                                                          | 3- <i>epi</i> -ajmalicine                                           | C <sub>21</sub> H <sub>24</sub> O <sub>3</sub> N <sub>2</sub>  | 352.1787 | [26] |
| 91                                                          | akuammigine                                                         | C <sub>21</sub> H <sub>24</sub> O <sub>3</sub> N <sub>2</sub>  | 352.1787 | [13] |
| 92                                                          | rauniticine                                                         | C <sub>21</sub> H <sub>24</sub> O <sub>3</sub> N <sub>2</sub>  | 352.1787 | [33] |
| 93                                                          | 14 $\alpha$ -hydroxyrauniticine                                     | C <sub>21</sub> H <sub>24</sub> O <sub>4</sub> N <sub>2</sub>  | 368.1736 | [33] |
| 94                                                          | 14 $\beta$ -hydroxy-3-isorauniticine                                | C <sub>21</sub> H <sub>24</sub> O <sub>4</sub> N <sub>2</sub>  | 368.1736 | [26] |
| 95                                                          | 3-isorauniticine                                                    | C <sub>21</sub> H <sub>24</sub> O <sub>3</sub> N <sub>2</sub>  | 352.1787 | [26] |
| 96                                                          | tetrahydroalstonine                                                 | C <sub>21</sub> H <sub>24</sub> O <sub>3</sub> N <sub>2</sub>  | 352.1787 | [34] |
| 97                                                          | diangoutengjian                                                     | C <sub>21</sub> H <sub>26</sub> O <sub>4</sub> N <sub>2</sub>  | 370.1893 | [35] |
| 98                                                          | tetrahydroalstonine <i>N</i> -oxide                                 | C <sub>21</sub> H <sub>24</sub> O <sub>4</sub> N <sub>2</sub>  | 368.1736 | [26] |
| 99                                                          | rhynchophine                                                        | C <sub>36</sub> H <sub>38</sub> O <sub>11</sub> N <sub>2</sub> | 674.2476 | [13] |
| 100                                                         | strictosidine lactam                                                | C <sub>26</sub> H <sub>30</sub> O <sub>8</sub> N <sub>2</sub>  | 498.2002 | [13] |
| 101                                                         | vincoside lactam                                                    | C <sub>26</sub> H <sub>30</sub> O <sub>8</sub> N <sub>2</sub>  | 498.2002 | [13] |
| 102                                                         | 2'- <i>O</i> - $\beta$ -D-glucopyranosyl-11-hydroxyvincoside lactam | C <sub>32</sub> H <sub>40</sub> O <sub>14</sub> N <sub>2</sub> | 676.2480 | [11] |
| 103                                                         | vincoside lactam A                                                  | C <sub>26</sub> H <sub>32</sub> N <sub>2</sub> O <sub>10</sub> | 532.2057 | [13] |
| <b>yohimbine type</b>                                       |                                                                     |                                                                |          |      |
| 104                                                         | pseudoyohimbine                                                     | C <sub>21</sub> H <sub>26</sub> O <sub>3</sub> N <sub>2</sub>  | 354.1943 | [18] |
| 105                                                         | alloyohimbine                                                       | C <sub>21</sub> H <sub>26</sub> O <sub>3</sub> N <sub>2</sub>  | 354.1943 | [18] |
| 106                                                         | 3- <i>epi</i> - $\beta$ -yohimbine                                  | C <sub>21</sub> H <sub>26</sub> O <sub>3</sub> N <sub>2</sub>  | 354.1943 | [18] |
| 107                                                         | $\beta$ -yohimbine                                                  | C <sub>21</sub> H <sub>26</sub> O <sub>3</sub> N <sub>2</sub>  | 354.1943 | [18] |
| 108                                                         | $\alpha$ -yohimbine                                                 | C <sub>21</sub> H <sub>26</sub> O <sub>3</sub> N <sub>2</sub>  | 354.1943 | [18] |
| 109                                                         | yohimbine                                                           | C <sub>21</sub> H <sub>26</sub> O <sub>3</sub> N <sub>2</sub>  | 354.1943 | [18] |
| <b>pyridino-indolo-quinolizidinone type, angustine-type</b> |                                                                     |                                                                |          |      |
| 110                                                         | angustine                                                           | C <sub>20</sub> H <sub>15</sub> ON <sub>3</sub>                | 313.1215 | [36] |
| 111                                                         | angustidine                                                         | C <sub>19</sub> H <sub>15</sub> ON <sub>3</sub>                | 301.1215 | [36] |
| 112                                                         | angustoline                                                         | C <sub>20</sub> H <sub>17</sub> O <sub>2</sub> N <sub>3</sub>  | 331.1321 | [36] |
| <b>cadambine type</b>                                       |                                                                     |                                                                |          |      |
| 113                                                         | cadambine                                                           | C <sub>27</sub> H <sub>32</sub> O <sub>10</sub> N <sub>2</sub> | 544.2057 | [17] |
| 114                                                         | 3 $\alpha$ -dihydrocadambine                                        | C <sub>27</sub> H <sub>34</sub> O <sub>10</sub> N <sub>2</sub> | 546.2214 | [14] |
| 115                                                         | 3 $\beta$ -isodihydrocadambine                                      | C <sub>27</sub> H <sub>34</sub> O <sub>10</sub> N <sub>2</sub> | 546.2214 | [17] |
| <b>3-Oxo-3,7-seco-monoterpene indoles</b>                   |                                                                     |                                                                |          |      |

|                                    |                                            |                                                               |          |      |
|------------------------------------|--------------------------------------------|---------------------------------------------------------------|----------|------|
| 116                                | 3-oxo-7-hydroxy-3,7-secorhynchophylline    | C <sub>22</sub> H <sub>28</sub> O <sub>6</sub> N <sub>2</sub> | 416.1947 | [37] |
| 117                                | villocarine B                              | C <sub>22</sub> H <sub>26</sub> O <sub>6</sub> N <sub>2</sub> | 414.1791 | [12] |
| 118                                | hirsutanine D                              | C <sub>21</sub> H <sub>24</sub> O <sub>6</sub> N <sub>2</sub> | 401.1634 | [32] |
| 119                                | hirsutanine E                              | C <sub>21</sub> H <sub>24</sub> O <sub>6</sub> N <sub>2</sub> | 401.1634 | [32] |
| 120                                | hirsutanine F                              | C <sub>20</sub> H <sub>24</sub> O <sub>5</sub> N <sub>2</sub> | 372.1685 | [32] |
| 121                                | 18 $\alpha$ -hirsutanine F                 | C <sub>20</sub> H <sub>24</sub> O <sub>5</sub> N <sub>2</sub> | 372.1685 | [32] |
| <b>dimeric monoterpene indoles</b> |                                            |                                                               |          |      |
| 122                                | callophylline A                            | C <sub>43</sub> H <sub>52</sub> O <sub>7</sub> N <sub>4</sub> | 736.3836 | [38] |
| 123                                | callophylline B                            | C <sub>43</sub> H <sub>52</sub> O <sub>8</sub> N <sub>4</sub> | 752.3785 | [38] |
| 124                                | callophylline                              | C <sub>43</sub> H <sub>52</sub> O <sub>7</sub> N <sub>4</sub> | 736.3836 | [18] |
| 125                                | roxburghine A                              | C <sub>31</sub> H <sub>32</sub> O <sub>2</sub> N <sub>4</sub> | 492.2525 | [39] |
| 126                                | roxburghine B                              | C <sub>31</sub> H <sub>32</sub> O <sub>2</sub> N <sub>4</sub> | 492.2525 | [39] |
| 127                                | roxburghine C                              | C <sub>31</sub> H <sub>32</sub> O <sub>2</sub> N <sub>4</sub> | 492.2525 | [39] |
| 128                                | roxburghine D                              | C <sub>31</sub> H <sub>32</sub> O <sub>2</sub> N <sub>4</sub> | 492.2525 | [39] |
| 129                                | roxburghine E                              | C <sub>31</sub> H <sub>32</sub> O <sub>2</sub> N <sub>4</sub> | 492.2525 | [39] |
| 130                                | roxburghine X                              | C <sub>31</sub> H <sub>32</sub> O <sub>2</sub> N <sub>4</sub> | 492.2525 | [40] |
| <b>others</b>                      |                                            |                                                               |          |      |
| 131                                | uncariagambiriine                          | C <sub>36</sub> H <sub>32</sub> O <sub>8</sub> N <sub>2</sub> | 620.2159 | [41] |
| 132                                | salacin                                    | C <sub>17</sub> H <sub>20</sub> O <sub>3</sub> N <sub>2</sub> | 300.1474 | [37] |
| 133                                | alkaloid us 7                              | C <sub>22</sub> H <sub>26</sub> O <sub>6</sub> N <sub>2</sub> | 414.1791 | [42] |
| 134                                | alkaloid us 8                              | C <sub>22</sub> H <sub>26</sub> O <sub>6</sub> N <sub>2</sub> | 414.1791 | [42] |
| 135                                | hirsutanine A                              | C <sub>11</sub> H <sub>15</sub> O <sub>3</sub> N              | 209.1052 | [43] |
| 136                                | hirsutanine B                              | C <sub>10</sub> H <sub>13</sub> O <sub>3</sub> N              | 195.0895 | [43] |
| 137                                | hirsutanine C                              | C <sub>20</sub> H <sub>24</sub> O <sub>5</sub> N <sub>2</sub> | 372.1685 | [43] |
| 138                                | 3-diethylamino-5-methoxy-1, 2-benzoquinone | C <sub>11</sub> H <sub>15</sub> O <sub>3</sub> N              | 209.1052 | [44] |
| 139                                | 3-ethylamino-5-methoxy-1, 2-benzoquinone   | C <sub>9</sub> H <sub>10</sub> O <sub>3</sub> N               | 181.0739 | [44] |
| 140                                | (-)-uncarilin A                            | C <sub>38</sub> H <sub>42</sub> O <sub>4</sub> N <sub>6</sub> | 646.3268 | [45] |
| 141                                | (+)-uncarilin A                            | C <sub>38</sub> H <sub>42</sub> O <sub>4</sub> N <sub>6</sub> | 646.3268 | [45] |
| 142                                | (-)-uncarilin B                            | C <sub>38</sub> H <sub>42</sub> O <sub>4</sub> N <sub>6</sub> | 646.3268 | [45] |
| 143                                | (+)-uncarilin B                            | C <sub>38</sub> H <sub>42</sub> O <sub>4</sub> N <sub>6</sub> | 646.3268 | [45] |

Table S2. Databases used and their detailed information

| Database Name   | Version      | Access date    | Website links                                                                                                             | References |
|-----------------|--------------|----------------|---------------------------------------------------------------------------------------------------------------------------|------------|
| ClueGO          | v2.5.4       | 2019-02-28     | <a href="http://apps.cytoscape.org/apps/cluego">http://apps.cytoscape.org/apps/cluego</a>                                 | [46]       |
| ConsensusPathDB | Release 34   | 2019-01-15     | <a href="http://consensuspathdb.org/">http://consensuspathdb.org/</a>                                                     | [47]       |
| Cytoscape       | 3.7.2        | Latest Version | <a href="https://cytoscape.org/">https://cytoscape.org/</a>                                                               | [48]       |
| DrugBank        | 5.1.3        | 2019-04-02     | <a href="https://www.drugbank.ca/">https://www.drugbank.ca/</a>                                                           | [49]       |
| DrugBank        | 5.1.4        | 2019-07-02     | <a href="https://www.drugbank.ca/">https://www.drugbank.ca/</a>                                                           | [49]       |
| FAF-Drugs4      | Version 4    | 2017-04-26     | <a href="http://fafdrugs4.mti.univ-paris-diderot.fr/index.html">http://fafdrugs4.mti.univ-paris-diderot.fr/index.html</a> | [50]       |
| Metascape       | Data updated | 2019-08-14     | <a href="http://metascape.org/gp/index.html#/main/step1">http://metascape.org/gp/index.html#/main/step1</a>               | [51]       |

|                                             |                             |            |                                                                                                                     |         |
|---------------------------------------------|-----------------------------|------------|---------------------------------------------------------------------------------------------------------------------|---------|
| PharmMapper                                 | monthly<br>Version<br>2017  | 2016-01-01 | <a href="http://www.lilab-ecust.cn/pharmmapper/">http://www.lilab-ecust.cn/pharmmapper/</a>                         | [52,53] |
| Similarity<br>ensemble<br>approach<br>(SEA) | Latest<br>Version           | 2019-03-26 | <a href="http://sea.bkslab.org/">http://sea.bkslab.org/</a>                                                         | [54]    |
| String                                      | 11.0                        | 2019-01-19 | <a href="https://string-db.org/">https://string-db.org/</a>                                                         | [55,56] |
| SwissTargetPrediction                       | Validation<br>dataset       | 2019       | <a href="http://www.swisstargetprediction.ch/index.php">http://www.swisstargetprediction.ch/index.php</a>           | [57]    |
| TargetNet                                   | 1.0                         | 2014-02-25 | <a href="http://targetnet.scbdd.com/">http://targetnet.scbdd.com/</a>                                               | [58]    |
| Therapeutic<br>Target<br>Database<br>(TTD)  | Update<br>2018              | 2017-09-15 | <a href="https://db.idrblab.org/ttd/">https://db.idrblab.org/ttd/</a>                                               | [59]    |
| WebGestalt                                  | WebGestalt<br>2019          | 2019-12-09 | <a href="http://www.webgestalt.org/">http://www.webgestalt.org/</a>                                                 | [60]    |
| Wikipathways                                | December<br>2019<br>Release | 2019-12    | <a href="https://www.wikipathways.org/index.php/WikiPathway">https://www.wikipathways.org/index.php/WikiPathway</a> | [61]    |

**Table S3.** *In vitro* BChE enzyme activity assay of galantamine as the positive control.

| Conc.<br>( $\mu$ M) | Inhibition rate (%) |
|---------------------|---------------------|
|                     | galantamine         |
| 10                  | 2.86                |
| 50                  | 41.00               |
| 100                 | 53.47               |
| 200                 | 59.62               |
| IC <sub>50</sub>    | 18.21               |

## References

1. Phillipson, J.D.; Hemingway, S.R.J.P. Alkaloids of *Uncaria attenuata*, *U. orientalis* and *U. Canescens*. **1975**, *14*, 1855-1863.
2. Kitajima, M.; Hashimoto, K.-i.; Yokoya, M.; Takayama, H.; Aimi, N.; SAKAI, S.-i.J.C.; bulletin, p. A New Gluco Indole Alkaloid, 3, 4-Dehydro-5-carboxystriatosidine, from Preruvian Una de Gato (*Uncaria tomentosa*). **2000**, *48*, 1410-1412.
3. Arbain, D.; Putri, M.; Sargent, M.; Syarif, M.J.A.J.o.C. The alkaloids of *Uncaria glabrata*. **1993**, *46*, 863-872.
4. Xin, W.B.; Chou, G.X.; Wang, Z.T.J.C.C.L. Two new alkaloids from the leaves of

- 
- Uncaria hirsuta* Haviland. **2008**, *19*, 931-933.
5. Xin, W.-B.; Chou, G.-X.; Wang, Z.-T.J.P.I. Bis (monoterpenoid) indole alkaloid glucosides from *Uncaria hirsuta*. **2011**, *4*, 380-382.
  6. Shimada, Y.; Goto, H.; Itoh, T.; SAKAKIBARA, I.; KUBO, M.; SASAKI, H.; TERASAWA, K.J.J.o.P.; Pharmacology. Evaluation of the protective effects of alkaloids isolated from the hooks and stems of *Uncaria sinensis* on glutamate-induced neuronal death in cultured cerebellar granule cells from rats. **1999**, *51*, 715-722.
  7. Wang, K.; Zhou, X.-Y.; Wang, Y.-Y.; Li, M.-M.; Li, Y.-S.; Peng, L.-Y.; Cheng, X.; Li, Y.; Wang, Y.-P.; Zhao, Q.-S.J.J.o.n.p. Macrophyllonium and macrophyllines A and B, oxindole alkaloids from *Uncaria macrophylla*. **2011**, *74*, 12-15.
  8. Phillipson, J.D.; Hemingway, S.R.J.P. Oxindole alkaloids from *Uncaria macrophylla*. **1973**, *12*, 2795-2798.
  9. Yuan, D.; Ma, B.; Wu, C.; Yang, J.; Zhang, L.; Liu, S.; Wu, L.; Kano, Y.J.J.o.n.p. Alkaloids from the leaves of *Uncaria rhynchophylla* and their inhibitory activity on NO production in lipopolysaccharide-activated microglia. **2008**, *71*, 1271-1274.
  10. Liu, H.-M.; Feng, X.-Z.J.P. Oxindole alkaloids from *Uncaria sinensis*. **1993**, *33*, 707-710.
  11. Ma, B.; Wu, C.F.; Yang, J.Y.; Wang, R.; Kano, Y.; Yuan, D.J.H.C.A. Three new alkaloids from the leaves of *Uncaria rhynchophylla*. **2009**, *92*, 1575-1585.
  12. Matsuo, H.; Okamoto, R.; Zaima, K.; Hirasawa, Y.; Ismail, I.S.; Lajis, N.H.; Morita, H.J.B.; chemistry, m. New vasorelaxant indole alkaloids, villocarines A–D from *Uncaria villosa*. **2011**, *19*, 4075-4079.
  13. AIMI, N.; SHITO, T.; FUKUSHIMA, K.; ITAI, Y.; AOYAMA, C.; KUNISAWA, K.; SAKAI, S.; HAGINIWA, J.; YAMASAKI, K.J.C.; Bulletin, P. Studies on Plants containing Indole Alkaloids. VIII Indole Alkaloid Glycosides and Other Constituents of the Leaves of *Uncaria rhynchophylla* MIQ. **1982**, *30*, 4046-4051.
  14. KOHDA, H.; NAMERA, A.; KOYAMA, A.; YAMASAKI, K.; TANI, T.J.C.; bulletin, p. Indole alkaloid production in callus cultures of *Uncaria rhynchophylla* (Miq.) Miquel. **1996**, *44*, 352-357.
  15. Aimi, N.; Yamanaka, E.; Endo, J.; Sakai, S.-i.; Haginiwa, J.J.T.L. Conversion of oxindole alkaloids into indole alkaloids. **1972**, *13*, 1081-1084.
  16. AIMI, N.; YAMANAKA, E.; SHINMA, N.; FUJII, M.; KURITA, J.; SAKAI, S.; HAGINIWA, J.J.C.; Bulletin, P. Studies on Plants containing Indole Alkaloids. VI. Minor Bases of *Uncaria rhynchophylla* MIQ. **1977**, *25*, 2067-2071.
  17. Qi, W.; Yue, S.-J.; Sun, J.-H.; Simpkins, J.W.; Zhang, L.; Yuan, D.J.J.o.A.n.p.r. Alkaloids from the hook-bearing branch of *Uncaria rhynchophylla* and their neuroprotective effects against glutamate-induced HT22 cell death. **2014**, *16*, 876-883.
  18. Kam, T.-S.; Lee, K.-H.; Goh, S.-H.J.P. Alkaloid distribution in Malaysian uncaria. **1992**, *31*, 2031-2034.
  19. Merlini, L.; Mondelli, R.; Nasini, G.; Hesse, M.J.T.I. Gambirine, a new indole alkaloid from uncaria gambier roxb. **1967**, *8*, 1571-1574.
  20. Aimi, N.; Yamanaka, E.; Ogawa, M.; Kohmoto, T.; Mogi, K.; Sakai, S.J.H. Preparation

- and stereochemistry of some indole alkaloid N-oxides. **1978**, *10*, 73-78.
21. Pan, H.; Yang, W.; Zhang, Y.; Yang, M.; Feng, R.; Wu, W.; Guo, D.J.A.; chemistry, b. An integrated strategy for the systematic characterization and discovery of new indole alkaloids from *Uncaria rhynchophylla* by UHPLC/DAD/LTQ-Orbitrap-MS. **2015**, *407*, 6057-6070.
  22. Diyabalanage, T.K.; Kumarihamy, B.M.; Wannigama, G.P.; Jayasinghe, L.; Merlini, L.; Scaglioni, L.J.P. Alkaloids of *Uncaria elliptica*. **1997**, *45*, 1731-1732.
  23. Monache, F.; Ferrari, F.; Marini-Bettolo, G.J.I.F.; scientifica, e. Alkaloids and procyanidins of an *Uncaria* sp. from Peru. **1976**, *31*, 527-535.
  24. Liu, H.; Jiang, Z.; Feng, X.J.Y.x.x.b.A.p.S. New oxindole alkaloid glycosides from *Uncaria sinensis*. **1993**, *28*, 849-853.
  25. Chan, K.J.P. The stereochemistry of pteropodine and isopteropodine. **1969**, *8*, 219-222.
  26. Phillipson, J.D.; Supavita, N.J.P. Alkaloids of *uncaria elliptica*. **1983**, *22*, 1809-1813.
  27. Wu, T.S.; Chan, Y.Y.J.J.o.t.C.C.S. Constituents of leaves of *Uncaria hirsuta* Haviland. **1994**, *41*, 209-212.
  28. TANAHASHI, T.; TAKENAKA, Y.; KOBAYASHI, C.; WATSUJI, J.; NAGAKURA, N.; Cheng-Chang, C.J.N.m.生. Oxindole alkaloids from *Uncaria setiloba*. **1997**, *51*, 556.
  29. Lala, P.J.F.-. Alkaloidal profile of *Mitragyna stipulosa*. **1985**.
  30. Chan, K.J.T.I. Gambirdine and isogambirdine, the alkaloids from *uncaria gambir* (hunt) roxb. **1968**, *9*, 3403-3406.
  31. Salim, F.; Ismail, N.H.; Awang, K.; Ahmad, R.J.M. Rauniticine-allo-oxindole B and rauniticinic-allo acid B, new heteroyohimbine-type oxindole alkaloids from the stems of Malaysian *Uncaria longiflora* var. *pteropoda*. **2011**, *16*, 6541-6548.
  32. Pan, H.-q.; Yang, W.-z.; Zhao, D.; Luo, C.; Yao, C.-l.; Shi, X.-j.; Zhang, Y.-b.; Li, S.-y.; Bi, Y.; Wang, Z.J.F. New monoterpenoid oxindole alkaloid derivatives from the stems of *Uncaria hirsuta* Havil. and their cytotoxicity and tandem mass spectrometric fragmentation. **2017**, *116*, 85-92.
  33. Arbain, D.; Ibrahim, S.; Sargent, M.V.; Skelton, B.W.; White, A.H.J.A.j.o.c. The alkaloids of *Uncaria* cf. *glabrata*. **1998**, *51*, 961-964.
  34. Ponglux, D.; Supavita, T.; Verpoorte, R.; Phillipson, D.J.P. Alkaloids of *Uncaria attenuata* from Thailand. **1980**, *19*, 2013-2016.
  35. Tao, Z.; Yi, Y.; Xu, Q.J.Y.x.x.b.A.p.S. Studies on the chemical constituents of *Uncaria yunnanensis* Hsia. CC. **2001**, *36*, 120-122.
  36. Phillipson, J.D.; Hemingway, S.R.; Bisset, N.G.; Houghton, P.J.; Shellard, E.J.J.P. Angustine and related alkaloids from species of *Mitragyna*, *nauclea*, *uncaria*, and *Strychnos*. **1974**, *13*, 973-978.
  37. PONGLUX, D.; WONGSERIPATANA, S.; AIMI, N.; NISHIMURA, M.; ISHIKAWA, M.; SADA, H.; HAGINIWA, J.; SAKAI, S.-i.J.C.; bulletin, p. Structure and synthesis of two new types of oxindole alkaloids found from *Uncaria salaccensis*. **1990**, *38*, 573-575.
  38. Kam, T.-S.; Lee, K.-H.; Goh, S.-H.J.P. Dimeric indole alkaloids from *Uncaria callophylla*. **1991**, *30*, 3441-3444.
  39. Merlini, L.; Mondelli, R.; Nasini, G.; Hesse, M.J.T. The structure of roxburghines A-E,

- new indole alkaloids from an *Uncaria* Sp. **1970**, *26*, 2259-2279.
40. Herath, W.; Sultanbawa, M.; Wannigama, G.; Cavé, A.J.P. Alkaloidal and other constituents of *Uncaria elliptica* and *Canthium dicoccum*. **1979**, *18*, 1385-1387.
  41. Yoshikado, N.; Taniguchi, S.; Kasajima, N.; Ohashi, F.; Doi, K.I.; Shibata, T.; Yoshida, T.; Hatano, T.J.H. Uncariagambiriine and gambircatechol: Novel constituents of *Uncaria gambir* leaves. **2009**, *77*, 793-800.
  42. Aimi, N.; Shimizu, T.; Sada, H.; Takayama, H.; Sakai, S.-i.; Wongseripipatana, S.; Ponglux, D.J.J.o.t.C.S., Perkin Transactions 1. Structures of Us-7 and Us-8: a new type of oxindole alkaloids isolated from *Uncaria attenuata* Korth. **1997**, 187-188.
  43. Jia, J.-F.; Zhang, Y.; Huang, X.-J.; Zhang, S.-Y.; Tian, H.-Y.; Wang, L.; Ye, W.-C.J.N.p.r. New monoterpene alkaloids from the aerial parts of *Uncaria hirsuta*. **2014**, *28*, 971-975.
  44. Qian, Z.; Lei, C.; Le-Jian, H.; Wen-Yuan, L.; Feng, F.; Wei, Q.J.C.j.o.n.m. Two new ortho benzoquinones from *Uncaria rhynchophylla*. **2016**, *14*, 232-235.
  45. Geng, C.-A.; Huang, X.-Y.; Ma, Y.-B.; Hou, B.; Li, T.-Z.; Zhang, X.-M.; Chen, J.-J.J.J.o.n.p. (±)-Uncarilins A and B, dimeric isoechinulin-type alkaloids from *Uncaria rhynchophylla*. **2017**, *80*, 959-964.
  46. Bindea, G.; Mlecnik, B.; Hackl, H.; Charoentong, P.; Tosolini, M.; Kirilovsky, A.; Fridman, W.H.; Pages, F.; Trajanoski, Z.; Galon, J. ClueGO: a Cytoscape plug-in to decipher functionally grouped gene ontology and pathway annotation networks. *Bioinformatics* **2009**, *25*, 1091-1093, doi:10.1093/bioinformatics/btp101.
  47. Kamburov, A.; Stelzl, U.; Lehrach, H.; Herwig, R. The ConsensusPathDB interaction database: 2013 update. *Nucleic Acids Res* **2013**, *41*, D793-800, doi:10.1093/nar/gks1055.
  48. Shannon, P.; Markiel, A.; Ozier, O.; Baliga, N.S.; Wang, J.T.; Ramage, D.; Amin, N.; Schwikowski, B.; Ideker, T. Cytoscape: a software environment for integrated models of biomolecular interaction networks. *Genome Res* **2003**, *13*, 2498-2504, doi:10.1101/gr.1239303.
  49. Wishart, D.S.; Knox, C.; Guo, A.C.; Cheng, D.; Shrivastava, S.; Tzur, D.; Gautam, B.; Hassanali, M. DrugBank: a knowledgebase for drugs, drug actions and drug targets. *Nucleic Acids Res* **2008**, *36*, D901-906, doi:10.1093/nar/gkm958.
  50. Lagorce, D.; Bouslama, L.; Becot, J.; Miteva, M.A.; Villoutreix, B.O. FAF-Drugs4: free ADME-tox filtering computations for chemical biology and early stages drug discovery. *Bioinformatics* **2017**, *33*, 3658-3660, doi:10.1093/bioinformatics/btx491.
  51. Zhou, Y.; Zhou, B.; Pache, L.; Chang, M.; Khodabakhshi, A.H.; Tanaseichuk, O.; Benner, C.; Chanda, S.K. Metascape provides a biologist-oriented resource for the analysis of systems-level datasets. *Nat Commun* **2019**, *10*, 1523, doi:10.1038/s41467-019-09234-6.
  52. Liu, X.; Ouyang, S.; Yu, B.; Liu, Y.; Huang, K.; Gong, J.; Zheng, S.; Li, Z.; Li, H.; Jiang, H. PharmMapper server: a web server for potential drug target identification using pharmacophore mapping approach. *Nucleic Acids Res* **2010**, *38*, W609-614, doi:10.1093/nar/gkq300.
  53. Wang, X.; Shen, Y.; Wang, S.; Li, S.; Zhang, W.; Liu, X.; Lai, L.; Pei, J.; Li, H. PharmMapper 2017 update: a web server for potential drug target identification with a comprehensive target pharmacophore database. *Nucleic Acids Res* **2017**, *45*,



- 
- W356-W360, doi:10.1093/nar/gkx374.
54. Gfeller, D.; Michielin, O.; Zoete, V. Shaping the interaction landscape of bioactive molecules. *Bioinformatics* **2013**, *29*, 3073-3079, doi:10.1093/bioinformatics/btt540.
  55. Szklarczyk, D.; Franceschini, A.; Wyder, S.; Forslund, K.; Heller, D.; Huerta-Cepas, J.; Simonovic, M.; Roth, A.; Santos, A.; Tsafou, K.P., et al. STRING v10: protein-protein interaction networks, integrated over the tree of life. *Nucleic Acids Res* **2015**, *43*, D447-452, doi:10.1093/nar/gku1003.
  56. Szklarczyk, D.; Gable, A.L.; Lyon, D.; Junge, A.; Wyder, S.; Huerta-Cepas, J.; Simonovic, M.; Doncheva, N.T.; Morris, J.H.; Bork, P., et al. STRING v11: protein-protein association networks with increased coverage, supporting functional discovery in genome-wide experimental datasets. *Nucleic Acids Res* **2019**, *47*, D607-D613, doi:10.1093/nar/gky1131.
  57. Daina, A.; Michielin, O.; Zoete, V. SwissTargetPrediction: updated data and new features for efficient prediction of protein targets of small molecules. *Nucleic Acids Res* **2019**, *47*, W357-W364, doi:10.1093/nar/gkz382.
  58. Yao, Z.J.; Dong, J.; Che, Y.J.; Zhu, M.F.; Wen, M.; Wang, N.N.; Wang, S.; Lu, A.P.; Cao, D.S. TargetNet: a web service for predicting potential drug-target interaction profiling via multi-target SAR models. *J Comput Aided Mol Des* **2016**, *30*, 413-424, doi:10.1007/s10822-016-9915-2.
  59. Chen, X.; Ji, Z.L.; Chen, Y.Z. TTD: Therapeutic Target Database. *Nucleic Acids Res* **2002**, *30*, 412-415, doi:10.1093/nar/30.1.412.
  60. Liao, Y.; Wang, J.; Jaehnig, E.J.; Shi, Z.; Zhang, B. WebGestalt 2019: gene set analysis toolkit with revamped UIs and APIs. *Nucleic Acids Res* **2019**, *47*, W199-W205, doi:10.1093/nar/gkz401.
  61. Slenter, D.N.; Kutmon, M.; Hanspers, K.; Riutta, A.; Windsor, J.; Nunes, N.; Melius, J.; Cirillo, E.; Coort, S.L.; Digles, D., et al. WikiPathways: a multifaceted pathway database bridging metabolomics to other omics research. *Nucleic Acids Res* **2018**, *46*, D661-D667, doi:10.1093/nar/gkx1064.
